# Supplementary material
Source: Springer Nature journal article supplement (https://www.springermedizin.de/resource/supplementary/12913_2007_670_MOESM4_ESM.pdf/9535278)

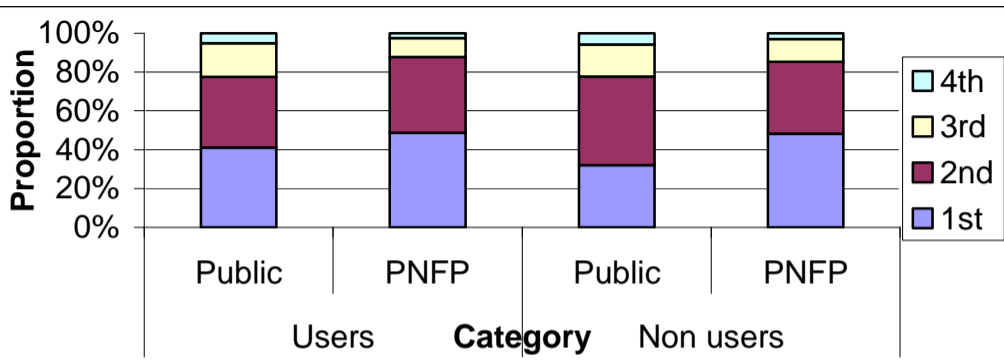

| Provider        | Users  |      | Non users |      |
|-----------------|--------|------|-----------|------|
|                 | Public | PNFP | Public    | PNFP |
| 1 <sup>st</sup> | 285    | 136  | 86        | 80   |
| 2 <sup>nd</sup> | 253    | 109  | 127       | 61   |
| 3 <sup>rd</sup> | 119    | 27   | 46        | 20   |
| 4 <sup>th</sup> | 36     | 7    | 16        | 5    |

Supplement: MOESM4 [file 9535278]
